# Supplementary material for: Engineered human cytokine/antibody fusion proteins expand regulatory T cells and confer autoimmune disease protection
Source: PubMed Central journal article supplement (PMC9631798; doi:10.1016/j.celrep.2022.111478), 2022-10-18
Supplement: NIHMS1843698-supplement-1.pdf [file NIHMS1843698-supplement-1.pdf]

**Supplemental information**

**Engineered human cytokine/antibody fusion proteins  
expand regulatory T cells and confer  
autoimmune disease protection**

**Derek VanDyke, Marcos Iglesias, Jakub Tomala, Arabella Young, Jennifer Smith, Joseph A. Perry, Edward Gebara, Amy R. Cross, Laurene S. Cheung, Arbor G. Dykema, Brian T. Orcutt-Jahns, Tereza Henclová, Jaroslav Golias, Jared Balolong, Luke M. Tomasovic, David Funda, Aaron S. Meyer, Drew M. Pardoll, Joanna Hester, Fadi Issa, Christopher A. Hunter, Mark S. Anderson, Jeffrey A. Bluestone, Giorgio Raimondi, and Jamie B. Spangler**

# Figure S1

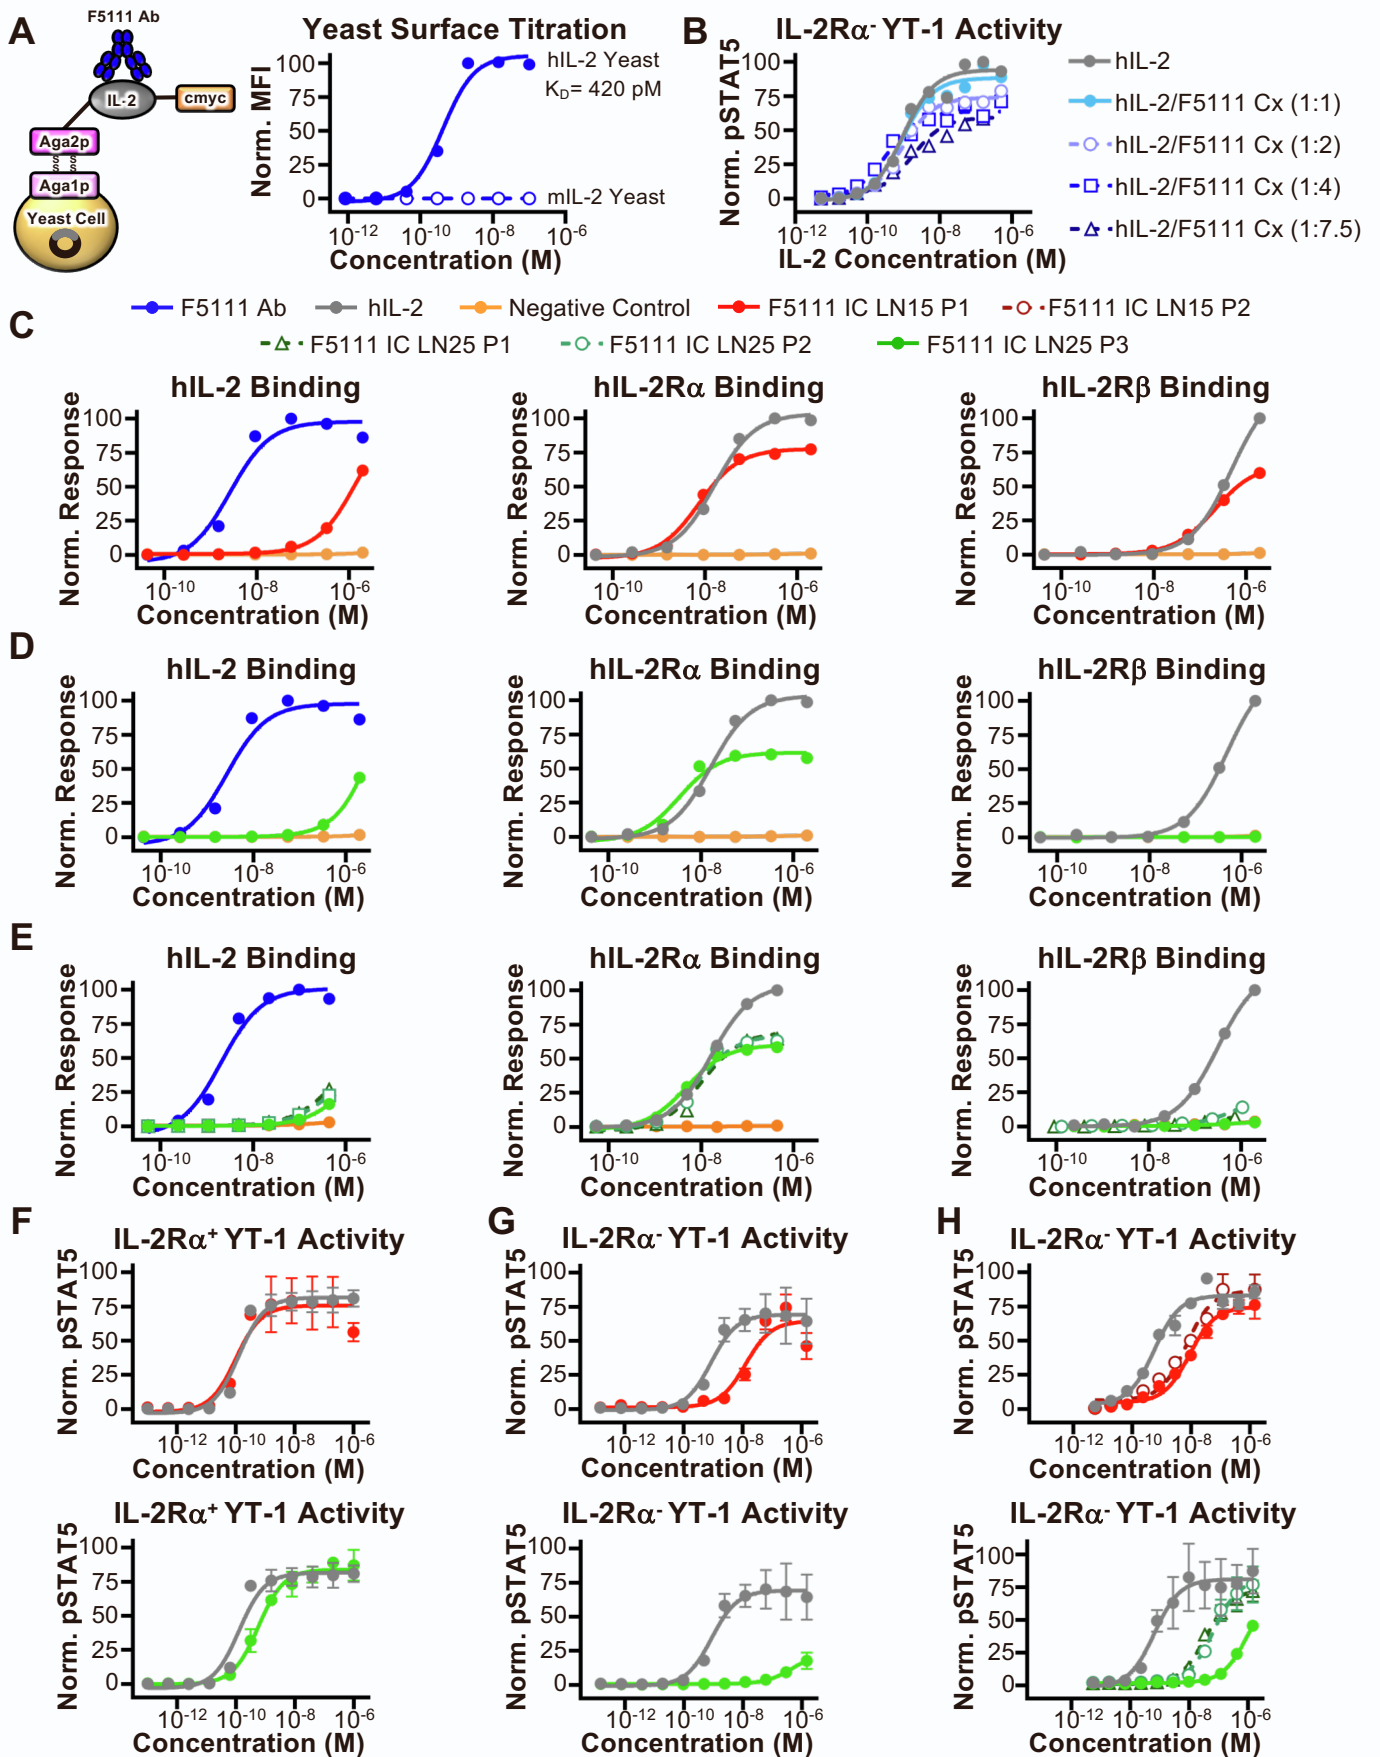

**Figure S1. Increasing IC linker length improves Treg bias. Related to Figures 1 and 2.**

**(A)** Binding of the F5111 antibody (Ab) to yeast-displayed hIL-2 or mL-2. Fitted equilibrium dissociation constant ( $K_D$ ) is shown. **(B)** STAT5 phosphorylation response of IL-2R $\alpha^-$  YT-1 human NK cells stimulated with either hIL-2 or hIL-2/F5111 complex (Cx) at varying molar ratios of cytokine to antibody. **(C-E)** Equilibrium biolayer interferometry-based titrations of hIL-2, F5111 antibody (Ab), Negative Control (trastuzumab), F5111 IC LN15 P1, and F5111 IC LN25 P1, P2, and P3 binding to immobilized hIL-2 (left), immobilized hIL-2R $\alpha$  (middle), and immobilized hIL-2R $\beta$  (right). **(F)** STAT5 phosphorylation response of IL-2R $\alpha^+$  YT-1 human NK cells stimulated with either hIL-2, F5111 IC LN15 P1 (top), or F5111 IC LN25 P3 (bottom). **(G)** STAT5 phosphorylation response of IL-2R $\alpha^-$  YT-1 human NK cells stimulated with either hIL-2, F5111 IC LN15 P1 (top), or F5111 IC LN25 P3 (bottom). **(H)** STAT5 phosphorylation response of IL-2R $\alpha^-$  YT-1 human NK cells stimulated with either hIL-2, F5111 IC LN15 P1 and P2 (top), or F5111 IC LN25 P1, P2, and P3 (bottom). Data in **(F-H)** represent mean  $\pm$  SD (n=3). See also **Tables S2 and S3**.

# Figure S2

**A**

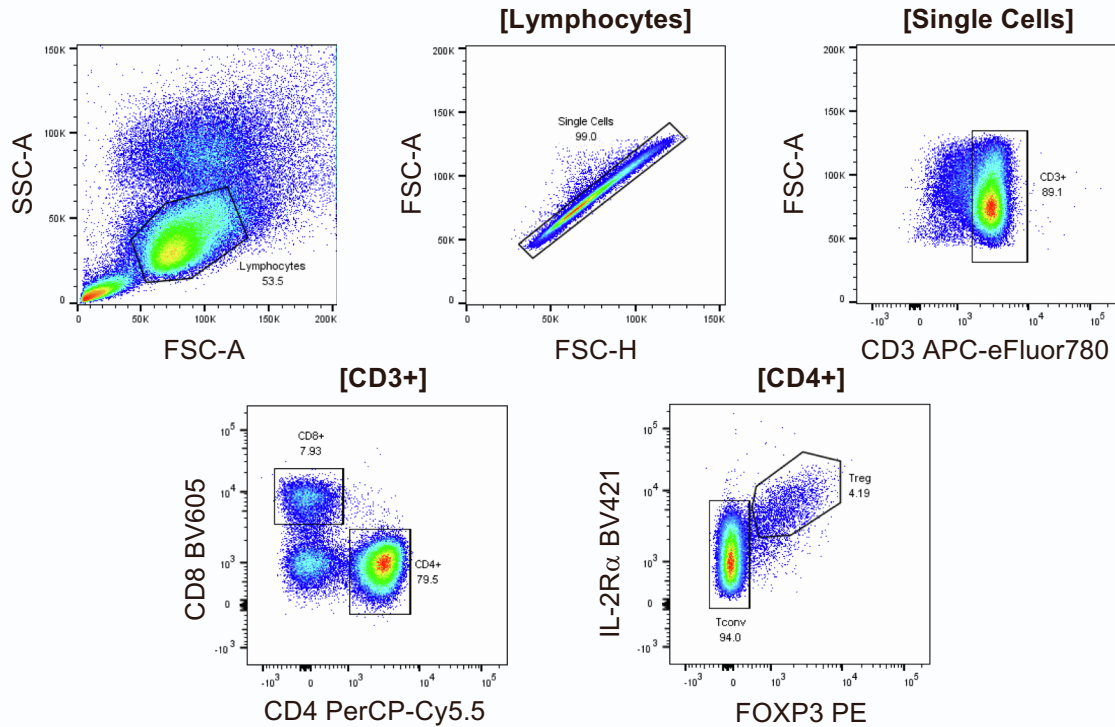

**B**

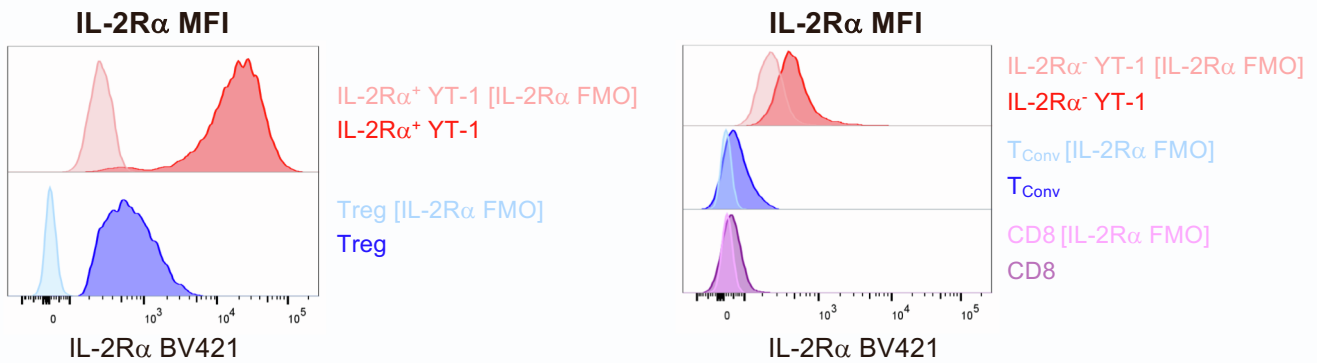

**Figure S2. IL-2R $\alpha$ <sup>+</sup> YT-1 cells express higher levels of IL-2R $\alpha$  than human Tregs. Related to Figures 2, 3, and 5. (A)** Representative flow cytometry plots illustrating the gating strategy used for human PBMCs. **(B)** Representative histograms illustrating IL-2R $\alpha$  MFI of IL-2R $\alpha$ <sup>+</sup> YT-1 cells and human Tregs (left) and IL-2R $\alpha$ <sup>-</sup> YT-1 cells, human CD8<sup>+</sup> T cells, and human T<sub>Conv</sub> cells (right) as compared to the IL-2R $\alpha$  fluorescence minus one (FMO) controls.

# Figure S3

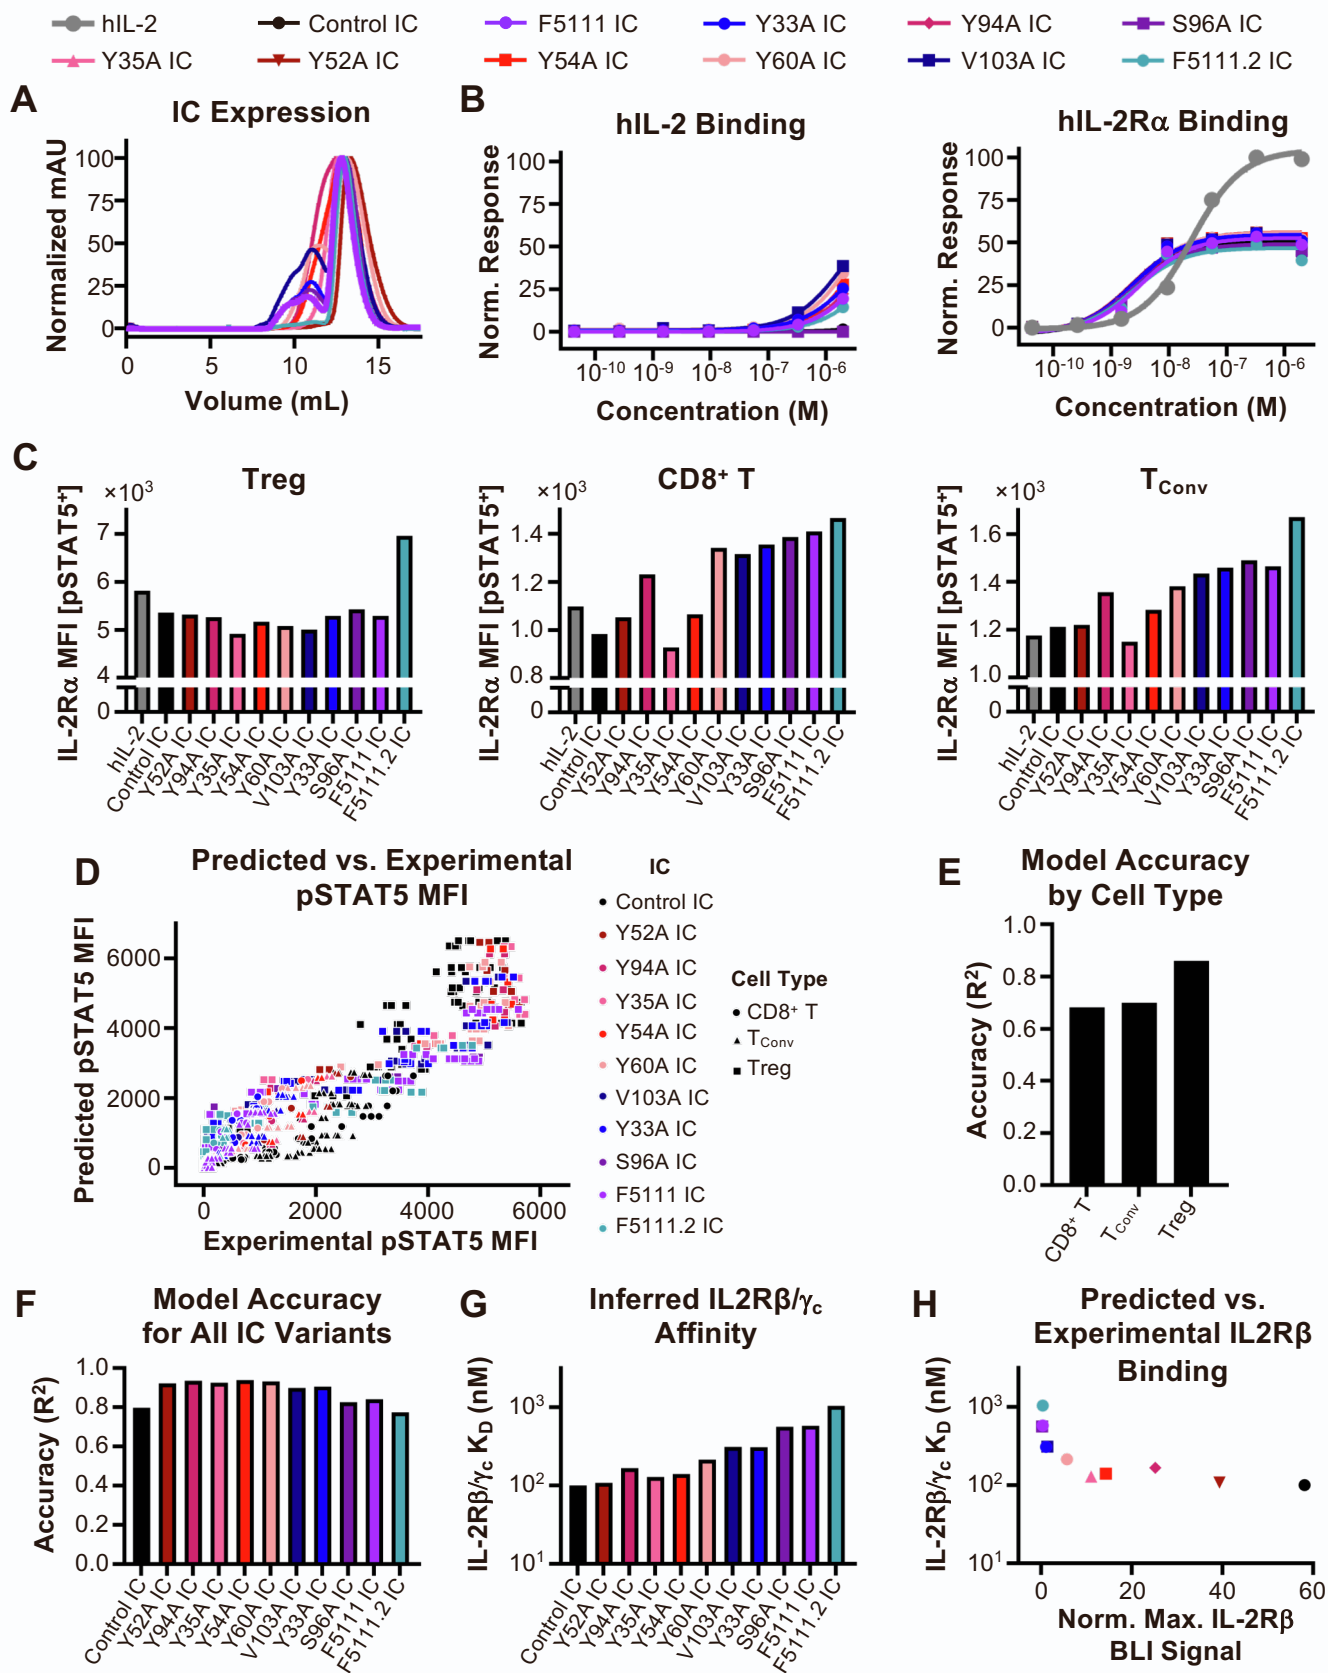

**Figure S3. Characterization of F5111 IC variants. Related to Figures 3 and 4. (A)** Overlay of SEC traces for F5111 IC variants. **(B)** Equilibrium biolayer interferometry-based titrations of hIL-2, Control IC, and F5111 IC variants binding to immobilized hIL-2 (left) and immobilized hIL-2R $\alpha$  (right). Binding to immobilized hIL-2 was normalized based on the binding of the F5111.2 antibody (**Figure S5C, left**). **(C)** IL-2R $\alpha$  MFI within the pSTAT5<sup>+</sup> population of Treg (left), CD8<sup>+</sup> T (middle), and T<sub>Conv</sub> (right) cell populations within human PBMCs stimulated with either hIL-2, Control IC, or F5111 IC variants at treatment concentrations of 2 nM (left) and 200 nM (middle and right). **(D)** Predicted vs. experimentally measured pSTAT5 MFI for all cell types, ICs, and concentrations modeled. Each point represents a single experimental measurement (n=1). **(E)** Model accuracy delineated by cell type for all ICs. **(F)** Model accuracy delineated by treatment for all ICs. Accuracies are calculated as a Pearson's correlation R<sup>2</sup>. **(G)** Inferred IL2R $\beta$ / $\gamma_c$  equilibrium dissociation constants (K<sub>D</sub>, nM) for each IC. **(H)** Inferred IL2R $\beta$ / $\gamma_c$  equilibrium dissociation constants (K<sub>D</sub>, nM) compared to the maximum normalized IL2R $\beta$  biolayer interferometry (BLI) signal experimentally measured for each IC. See also **Table S2**.

# Figure S4

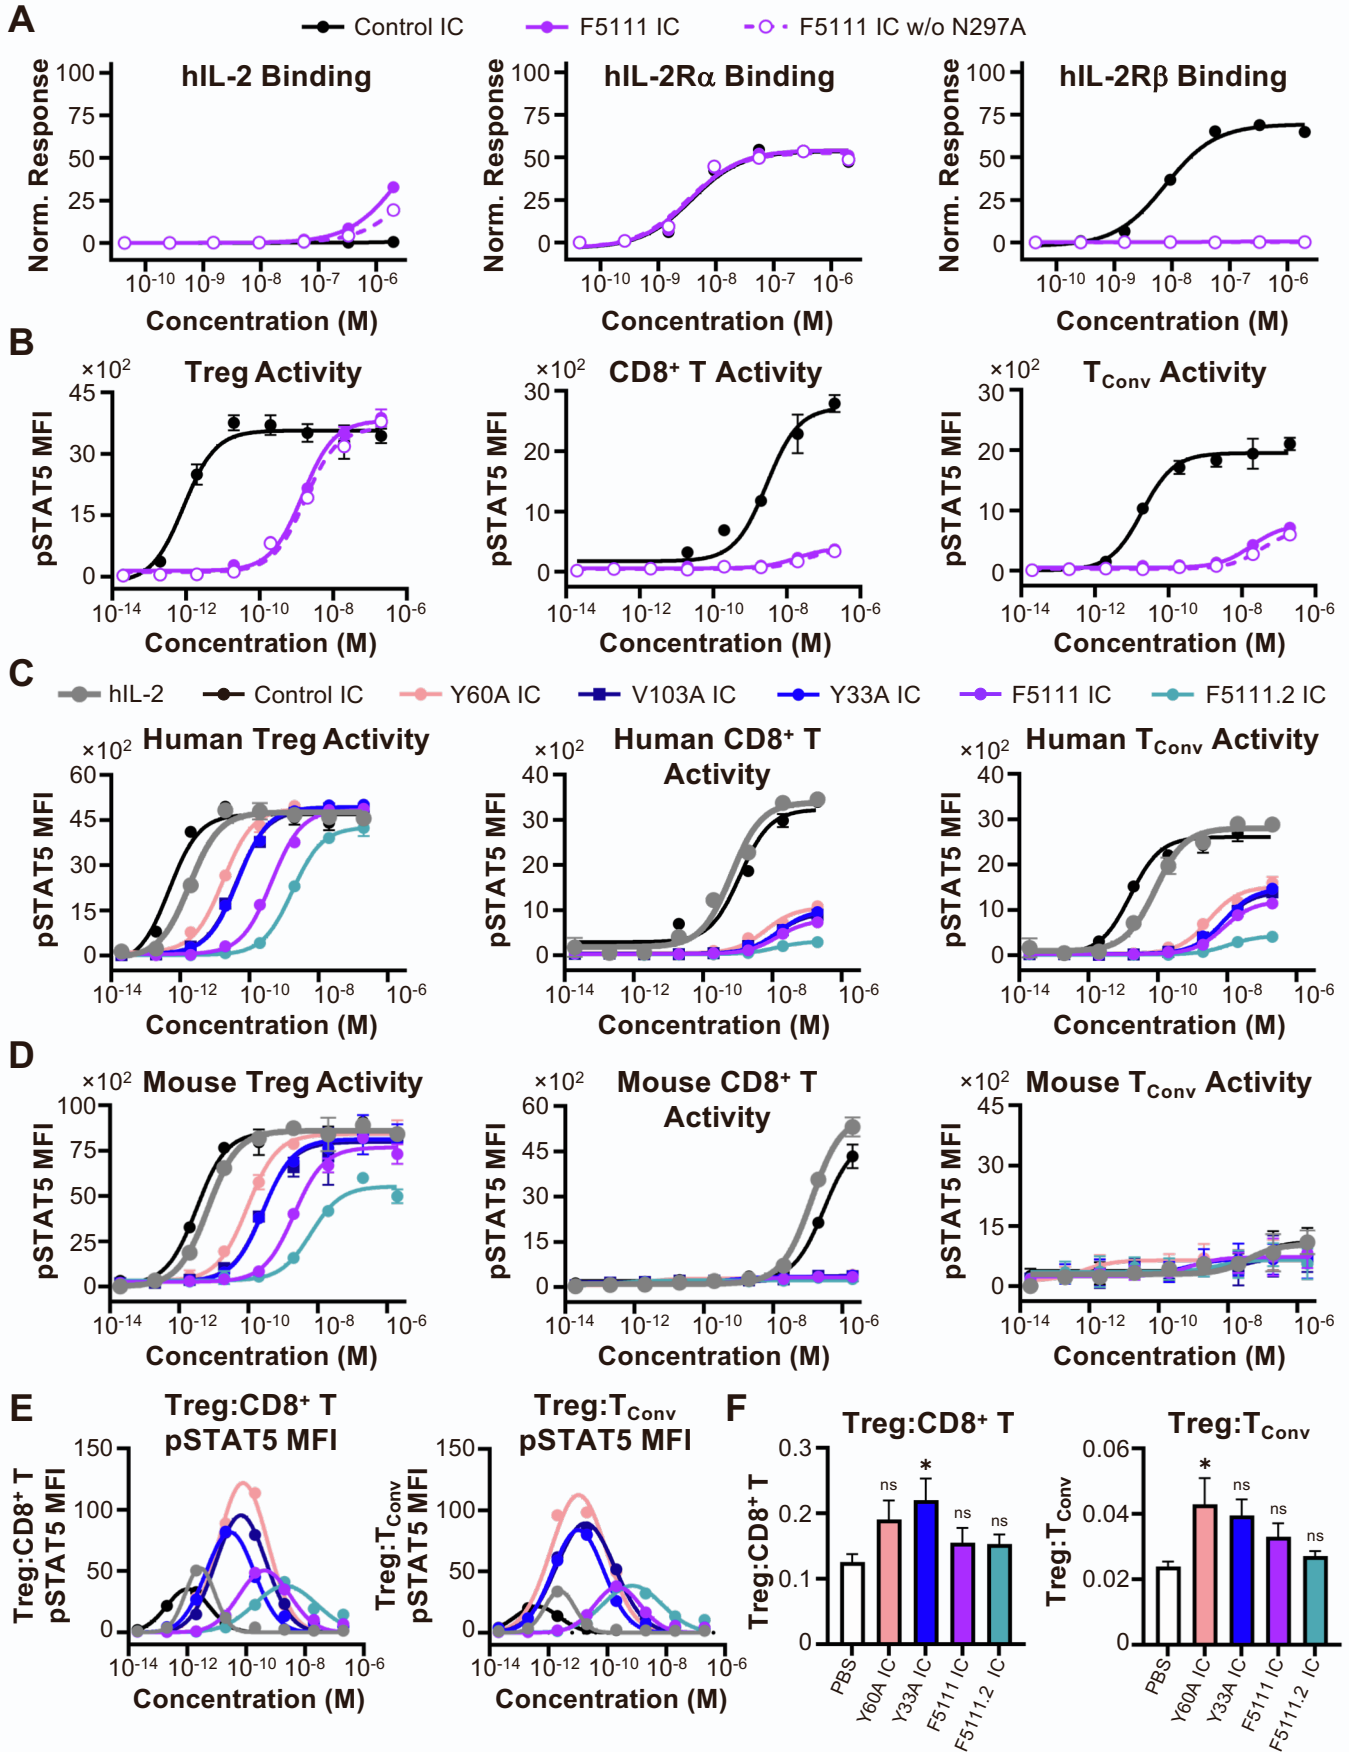

**Figure S4. The N297A mutation does not impact *in vitro* function and IC variants modulate Treg bias *in vitro* and *in vivo*. Related to Figures 3 and 4. (A)** Equilibrium biolayer interferometry-based titrations of Control IC, F5111 IC, and F5111 IC without the N297A mutation (w/o N297A, intact effector function) binding to immobilized hIL-2 (left), immobilized hIL-2R $\alpha$  (middle), and immobilized hIL-2R $\beta$  (right). Binding to immobilized hIL-2 was normalized based on the binding of the F5111.2 antibody (**Figure S5C, left**). **(B)** STAT5 phosphorylation response of Treg (left), CD8<sup>+</sup> T (middle), and T<sub>Conv</sub> (right) cell populations from human PBMCs stimulated with either Control IC, F5111 IC, or F5111 IC w/o N297A. Data represent mean  $\pm$  SD (n=3). **(C)** STAT5 phosphorylation response of Treg (left), CD8<sup>+</sup> T (middle), and T<sub>Conv</sub> (right) cell populations within human PBMCs stimulated with either hIL-2, Control IC, Y60A IC, V103A IC, Y33A IC, F5111 IC, or F5111.2 IC (all with N297A mutation). Data represent mean  $\pm$  SD (n=3). **(D)** STAT5 phosphorylation response of Treg (left), CD8<sup>+</sup> T (middle), and T<sub>Conv</sub> (right) cells isolated from spleens of NOD mice and stimulated with either hIL-2, Control IC, Y60A IC, V103A IC, Y33A IC, F5111 IC, or F5111.2 IC (all with N297A mutation). Data represent mean  $\pm$  SD (n=3). **(E)** Average pSTAT5 MFI ratio of human Treg:CD8<sup>+</sup> T (left) and human Treg:T<sub>Conv</sub> (right) for each IC determined at each stimulation concentration from the experiment shown in **(C)**. **(F)** BRG mice were administered  $5 \times 10^6$  human PBMCs (*i.p.*) on day 0 and then on day 1 were treated (*i.p.*) with either PBS (n=6) or 8.2  $\mu$ g (1.5  $\mu$ g IL-2 equivalence) Y60A IC (n=5), Y33A IC (n=4), F5111 IC (n=4), or F5111.2 IC (n=5). Cells were collected by lavage from the peritoneum on day 4 and ratios of human Treg:CD8<sup>+</sup> T (left) and Treg:T<sub>Conv</sub> (right) were evaluated. Data represent mean + SEM. Statistical significance was determined by one-way ANOVA with a Tukey post hoc test. Only statistical significance compared to PBS is shown on the plots. All statistical data are provided in **Table S6**. \*P $\leq$ 0.05, \*\*P $\leq$ 0.01, \*\*\*P $\leq$ 0.001, \*\*\*\*P $\leq$ 0.0001. See also **Tables S2, S4, and S5**.



# Figure S5

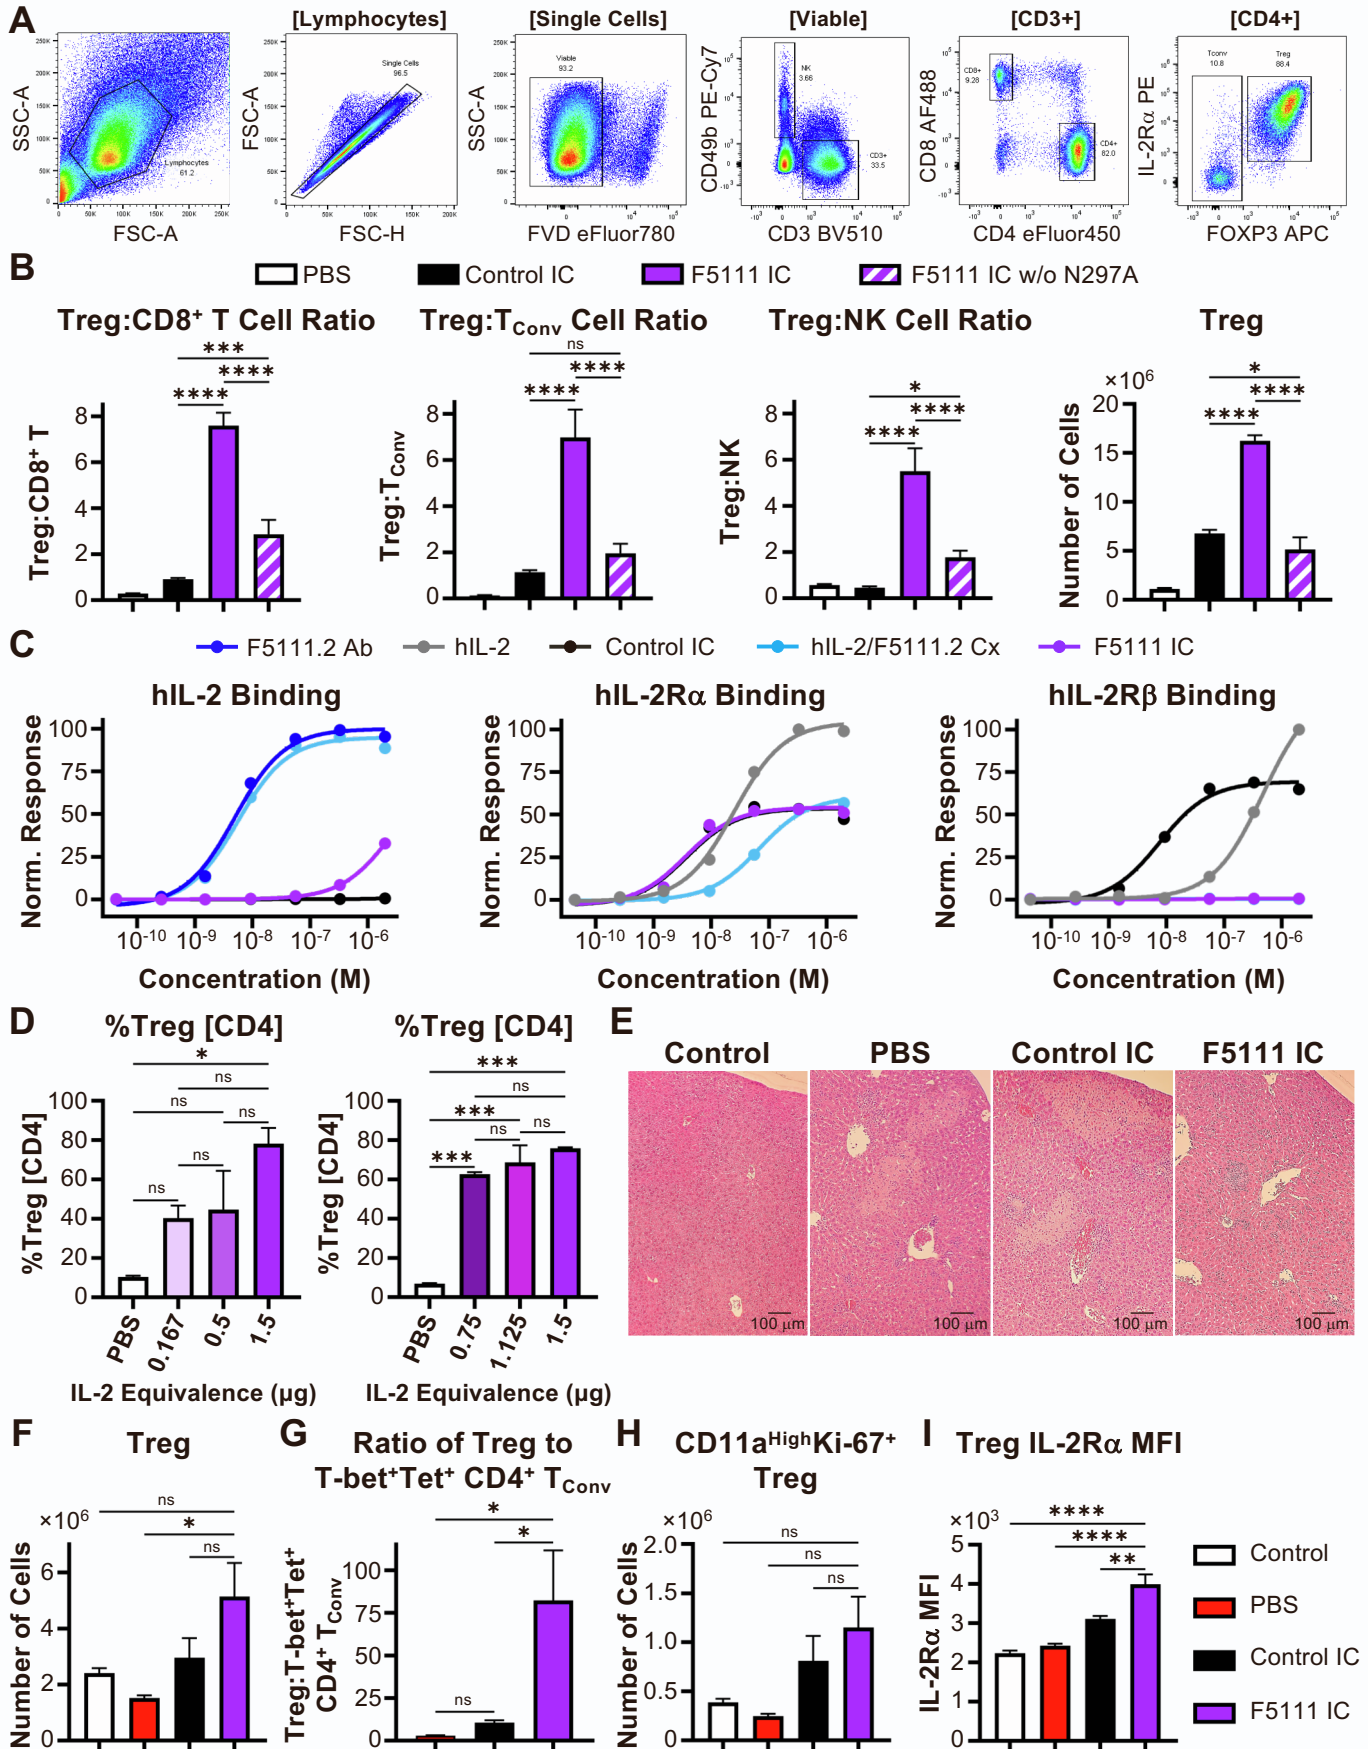

**Figure S5. *In vivo* characterization of F5111 IC. Related to Figures 4-6. (A)** Representative flow cytometry plots illustrating the gating strategy used for NOD mouse immune cell subset expansion studies. **(B)** Ratios of Treg to CD8<sup>+</sup> T cells (left), Treg to T<sub>Conv</sub> cells (middle), and Treg to NK cells (right) in spleens harvested from NOD mice (n=4 per group) treated daily for four days (*i.p.*) with either PBS or 8.2 μg (1.5 μg IL-2 equivalence) Control IC, F5111 IC, or F5111 IC without the N297A mutation (w/o N297A, intact effector function). Data represent mean + SD. Statistical significance was determined by one-way ANOVA with a Tukey post hoc test. Significance is shown between Control IC and F5111 IC with and without the N297A mutation. **(C)** Equilibrium biolayer interferometry-based titrations of F5111.2 antibody (Ab), hIL-2, Control IC, hIL-2/F5111.2 complex (Cx, 1:1 molar ratio), and F5111 IC binding to immobilized hIL-2 (left), immobilized hIL-2R $\alpha$  (middle), and immobilized hIL-2R $\beta$  (right). **(D)** C57BL/6 mice (n=2 per group) were treated daily for 4 days (*i.p.*) with either PBS or varying dosages of F5111 IC: 0.91 μg (0.167 μg IL-2 equivalence); 2.7 μg (0.5 μg IL-2 equivalence); 4.1 μg (0.75 μg IL-2 equivalence); 6.2 μg (1.125 μg IL-2 equivalence); or 8.2 μg (1.5 μg IL-2 equivalence). Spleens were harvested 24 hours after the last dose. Percent of Tregs within the CD4<sup>+</sup> T cell population is shown. Data represent mean + SD. Statistical significance was determined by one-way ANOVA with a Tukey post hoc test. **(E-I)** C57BL/6 mice were administered (*i.p.*) 25 cysts of the ME-49 strain of *Toxoplasma gondii* (*T. gondii*) on day 0. Control group designates disease-free mice that were not given cysts. Starting on day 1, mice were treated daily for 5 days (*i.p.*) with either PBS (Control, n=5; PBS, n=4) or 8.2 μg (1.5 μg IL-2 equivalence) Control IC (n=5) or F5111 IC (n=5). Mice were sacrificed on day 10. **(E)** Representative H&E staining of harvested mouse livers. Scale bar, 100 μm. **(F)** Total number of Tregs in harvested spleen. **(G)** Ratio of Tregs to T-bet<sup>+</sup>Tetramer (Tet)<sup>+</sup> CD4<sup>+</sup> T<sub>Conv</sub> cells in harvested mouse spleen. **(H)** Total number of CD11a<sup>High</sup>Ki-67<sup>+</sup> Tregs in harvested mouse spleen. **(I)** IL-2R $\alpha$  MFI of Tregs in harvested mouse spleen. Data in **(F-I)** represent mean + SEM. Statistical significance in **(F-I)** was determined by one-way ANOVA with a Tukey post hoc test. Significance compared to F5111 IC is shown. All statistical data are provided in **Table S6**. \*P $\leq$ 0.05, \*\*P $\leq$ 0.01, \*\*\*P $\leq$ 0.001, \*\*\*\*P $\leq$ 0.0001. See also **Table S2**.

# Figure S6

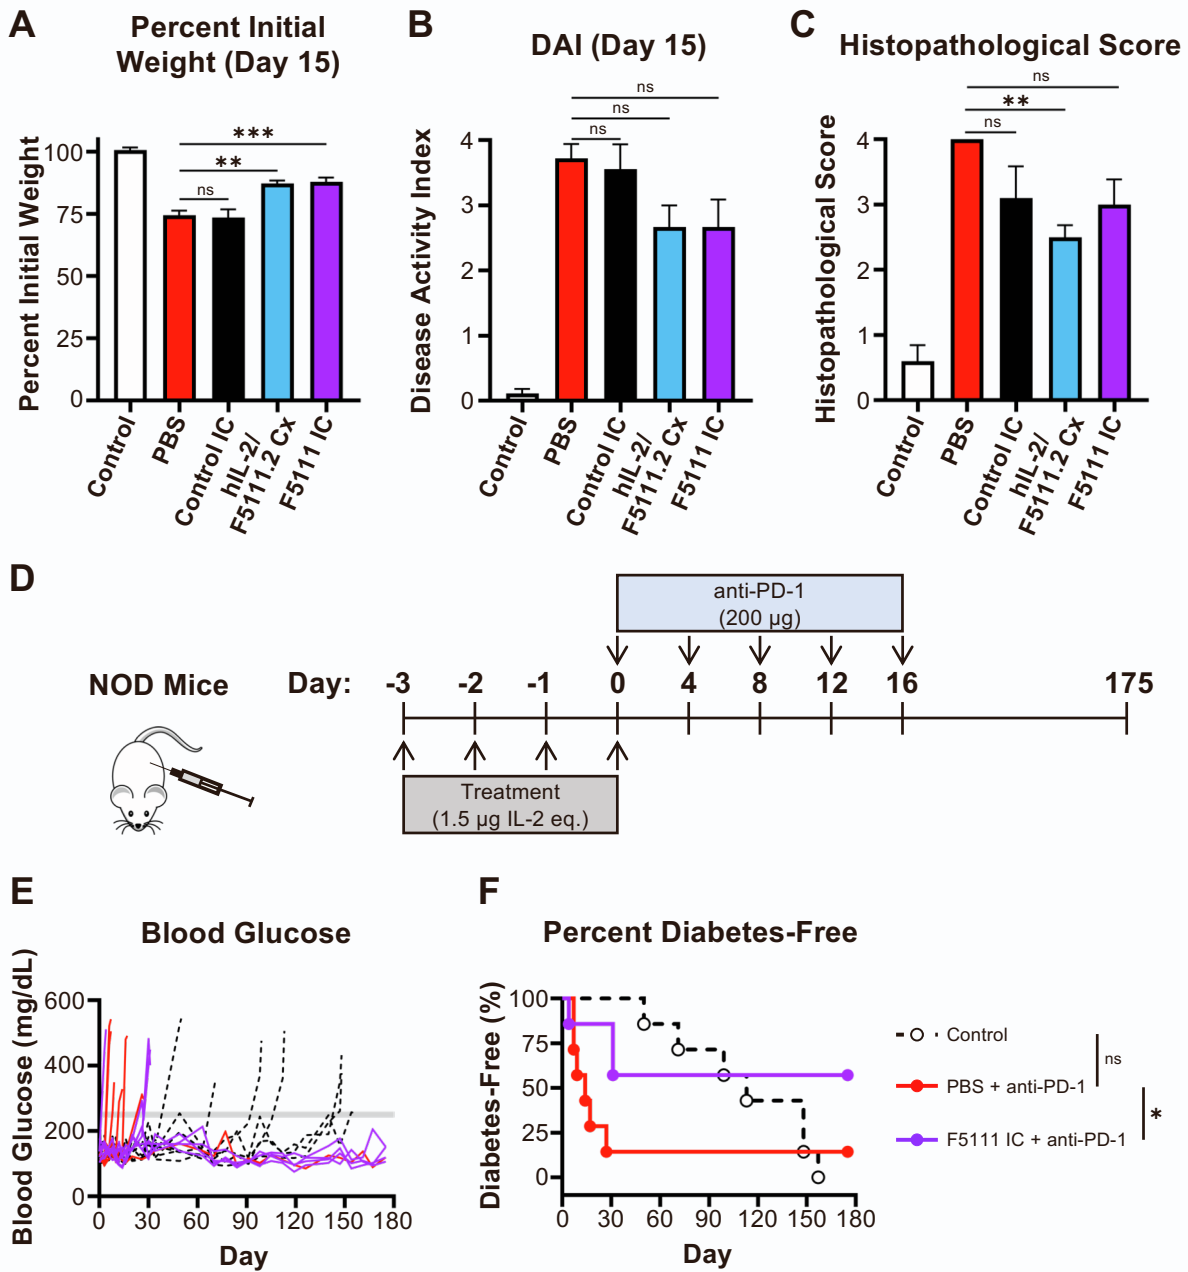

**Figure S6. Evaluation of F5111 IC in mouse models of autoimmune disease. Related to Figure 7. (A-C)** BALB/c mice (n=6 per group) were treated daily for 7 days (*i.p.*) with either PBS (Control and PBS), 1.5  $\mu$ g hIL-2 complexed with 6.6  $\mu$ g F5111.2 antibody (1:2 molar ratio, hIL-2/F5111.2 Cx), or 8.2  $\mu$ g (1.5  $\mu$ g IL-2 equivalence) Control IC or F5111 IC. Beginning on day 7, all groups except for the disease-free cohort (Control) were administered 3% DSS in their drinking water. Mice were sacrificed on day 15. **(A)** Weight change on day 15. **(B)** Disease activity index (DAI) on day 15. **(C)** Histopathology scores for H&E stained colons (n=5 Control, Control IC; n=6 PBS, Cx, F5111 IC). Data represent mean  $\pm$  SEM. Statistical significance was determined by one-way ANOVA with a Tukey post hoc test. All plots show significance of Control IC, Cx, and F5111 IC treated mice versus PBS treated mice. **(D-F)** 8-week-old NOD mice (n=7 per group) were treated daily for 4 days (*i.p.*, days -3, -2, -1, 0) with either PBS (Control and PBS) or 8.2  $\mu$ g (1.5  $\mu$ g IL-2 equivalence) F5111 IC. Starting on day 0 (4 hours after the last IC dose), mice were administered anti-PD-1 antibody (200  $\mu$ g) every 4 days until day 16. Control group designates mice that did not receive anti-PD-1 antibody. **(E)** Blood glucose concentrations over the study. The threshold 250 mg/dL value is indicated by the gray line. **(F)** Percent diabetes-free mice. Statistical significance was determined by pairwise comparisons using the Log-rank (Mantel-Cox) test. Statistical significance compared to mice treated with PBS + anti-PD-1 is shown. All statistical data are provided in **Table S6**. \*P $\leq$ 0.05, \*\*P $\leq$ 0.01, \*\*\*P $\leq$ 0.001, \*\*\*\*P $\leq$ 0.0001.

**Table S1. Antibody and IC sequences. Related to Figures 1 and 3.**

| Construct                                                                                                  | Amino Acid Sequence<br>Signal sequence – V <sub>H</sub> or V <sub>L</sub> – human IgG1 C <sub>H</sub> 1, C <sub>H</sub> 2, and C <sub>H</sub> 3 – hIL-2 – Linker – human Lambda C <sub>L</sub>                                                                                                                                                                                                                                                                                                                         |
|------------------------------------------------------------------------------------------------------------|------------------------------------------------------------------------------------------------------------------------------------------------------------------------------------------------------------------------------------------------------------------------------------------------------------------------------------------------------------------------------------------------------------------------------------------------------------------------------------------------------------------------|
| F5111 Heavy Chain<br>(Single-point alanine mutations)<br>(N297A)                                           | METDTLLLWVLLLWVPGSTGDQLQLQESGPGLVKPSQTLSTCTVSGGSISSGGYYWSWIR<br>QHPGKGLEWIGYIYSGSTIYNPSLKSRTISVDTSKNQFSLKLSVTAADTAVYYCARTPTV<br>TGDWFDWPWGRGTLVTVSSASTKGPSVFPLAPSSKSTSGGTAALGCLVKDYFPEPVTVSWN<br>SGALTSGVHTFPAVLQSSGLYSLSSVTVPSSSLGTQTYICNVNHKPSNTKVDKKEPKSCD<br>KTHTCPPCPAPELLGGPSVFLFPPKPKDTLMISRTPEVTCVVVDVSHEDPEVKFNWYVDGVE<br>VHNAKTKPREEQYNSTYRVVSVLTVLHQDWLNGKEYKCKVSNKALPAPIEKTISKAKGQPRE<br>PQVYTLPPSREEMTKNQVSLTCLVKGFYPSDIAVEWESNGQPENNYKTPPVLDSDGSFLL<br>YSKLTVDKSRWQQGNVFCFSVMHEALHNHYTQKLSLSLSPGK        |
| F5111 Light Chain                                                                                          | MRVPAQLLGLLLWLPGARCGSNFMLTQPHSVSESPGKTVTISCTRSSGSIASNYVQWYQQ<br>RPGSSPTTVIYEDNQRPSGVPDRFSGSIDSSNSASLTISGLKTEDEADYYCQSYDSSNVVF<br>GGGKTLTVLGQPKAAPSVTLPFPSSEELQANKATLVCLISDFYPGAVTVAWKADSSPVKAGV<br>ETTPSKQSNKYAASSYLSTPEQWKSHRSYSCQVTHEGSTVEKTVAPTECS                                                                                                                                                                                                                                                                  |
| F5111 Light Chain + hIL-2<br>LN15: X = 3<br>LN25: X = 5<br>LN35: X = 7<br>(Single-point alanine mutations) | MYRMQLLSCIALSLALVTNSAPTSSSTKKTQLQLEHLLLDLQMLNGINNYKNPKLTRMLTFKF<br>YMPKKATELKHLCLEELKPLEEVLNLAQSKNFHLRPRDLISINIVIVLELKGSETTFMCEYA<br>DETATIVEFLNRWITFCQSIISTLT(GGGGS) <sub>x</sub> NFMLTQPHSVSESPGKTVTISCTRSSGSIASN<br>YVQWYQQRPGSSPTTVIYEDNQRPSGVPDRFSGSIDSSNSASLTISGLKTEDEADYYCQS<br>YDSNVVFGGGKTLTVLGQPKAAPSVTLPFPSSEELQANKATLVCLISDFYPGAVTVAWKAD<br>SSPVKAGVETTPSKQSNKYAASSYLSTPEQWKSHRSYSCQVTHEGSTVEKTVAPTECS                                                                                                     |
| Control IC Heavy Chain<br>(N297A)                                                                          | METDTLLLWVLLLWVPGSTGDQVQLVESGGNLVQPGGSLRLSCAASGFTFGSFSMSWVRQ<br>APGGGLEWVAGLSARSSLTHYADSVKGRFTISRDNKNSVYLQMNSLRVEDTAVYYCARRS<br>YDSSGYWGHFYSDVWVGGTGLTVSASTKGPSVFPLAPSSKSTSGGTAALGCLVKDYFP<br>EPVTVSWNSGALTSGVHTFPAVLQSSGLYSLSSVTVPSSSLGTQTYICNVNHKPSNTKVDK<br>KVEPKSCDKTHTCPPCPAPELLGGPSVFLFPPKPKDTLMISRTPEVTCVVVDVSHEDPEVKF<br>FNWYVDGVEVHNAKTKPREEQYNSTYRVVSVLTVLHQDWLNGKEYKCKVSNKALPAPIEKT<br>ISKAKGQPREPQVYTLPPSREEMTKNQVSLTCLVKGFYPSDIAVEWESNGQPENNYKTPPV<br>LDSDGSFLLYSKLTVDKSRWQQGNVFCFSVMHEALHNHYTQKLSLSLSPGK |
| Control IC Light Chain + hIL-2                                                                             | MYRMQLLSCIALSLALVTNSAPTSSSTKKTQLQLEHLLLDLQMLNGINNYKNPKLTRMLTFKF<br>YMPKKATELKHLCLEELKPLEEVLNLAQSKNFHLRPRDLISINIVIVLELKGSETTFMCEYA<br>DETATIVEFLNRWITFCQSIISTLTGGGGSGGGSGGGSGGGSGGGSGGGSGGGSGGGG<br>SVLTVQSSVSAAPGQVTISCSGTSNIGNNYVSWYQQHPGKAPKLMYDVKRPSGVPD<br>RFSGSKSGNSASLDISGLQSEDEADYYCAAWDDSLSEFLFGTGTKLTVLGGQPKAAPSVTLP<br>FPSSEELQANKATLVCLISDFYPGAVTVAWKADSSPVKAGVETTPSKQSNKYAASSYLST<br>TPEQWKSHRSYSCQVTHEGSTVEKTVAPTECS                                                                                      |
| F5111.2 Heavy Chain<br>(N297A)                                                                             | METDTLLLWVLLLWVPGSTGDQLQLQESGPGLVKPSQTLSTCTVSGGSISSGGYYWSWIR<br>QHPGKGLEWIGYIYKSGSAYYSPSLKSRTISVDTSKNQFSLKLSVTAADTAVYYCARTPTV<br>TGDWFDWPWGRGTLVTVSSASTKGPSVFPLAPSSKSTSGGTAALGCLVKDYFPEPVTVSWN<br>SGALTSGVHTFPAVLQSSGLYSLSSVTVPSSSLGTQTYICNVNHKPSNTKVDKKEPKSCD<br>KTHTCPPCPAPELLGGPSVFLFPPKPKDTLMISRTPEVTCVVVDVSHEDPEVKFNWYVDGVE<br>VHNAKTKPREEQYNSTYRVVSVLTVLHQDWLNGKEYKCKVSNKALPAPIEKTISKAKGQPRE<br>PQVYTLPPSREEMTKNQVSLTCLVKGFYPSDIAVEWESNGQPENNYKTPPVLDSDGSFLL<br>YSKLTVDKSRWQQGNVFCFSVMHEALHNHYTQKLSLSLSPGK       |
| F5111.2 Light Chain                                                                                        | MRVPAQLLGLLLWLPGARCGSNFMLTQPHSVSESPGKTVTISCTRSSGSIASNYVQWYQQ<br>RPGSSPTTVIYEDNQRPSGVPDRFSGSIDSSNSASLTISGLKTEDEADYYCQYDSIDVYFG<br>GGKTLTVLGQPKAAPSVTLPFPSSEELQANKATLVCLISDFYPGAVTVAWKADSSPVKAGV<br>ETTPSKQSNKYAASSYLSTPEQWKSHRSYSCQVTHEGSTVEKTVAPTECS                                                                                                                                                                                                                                                                   |
| F5111.2 Light Chain + hIL-2                                                                                | MYRMQLLSCIALSLALVTNSAPTSSSTKKTQLQLEHLLLDLQMLNGINNYKNPKLTRMLTFKF<br>YMPKKATELKHLCLEELKPLEEVLNLAQSKNFHLRPRDLISINIVIVLELKGSETTFMCEYA<br>DETATIVEFLNRWITFCQSIISTLTGGGGSGGGSGGGSGGGSGGGSGGGSGGGSGGGG<br>SNFMLTQPHSVSESPGKTVTISCTRSSGSIASNYVQWYQQRPGSSPTTVIYEDNQRPSGVP<br>DRFSGSIDSSNSASLTISGLKTEDEADYYCQYDSIDVYFGGGKTLTVLGQPKAAPSVTLP<br>PSSEELQANKATLVCLISDFYPGAVTVAWKADSSPVKAGVETTPSKQSNKYAASSYLST<br>PEQWKSHRSYSCQVTHEGSTVEKTVAPTECS                                                                                     |

**Table S2. Equilibrium  $K_D$  values from biolayer interferometry studies. Related to Figures 2 and 3.**

| Treatment             | Equilibrium $K_D$ (nM) |                 |                | Figure       |
|-----------------------|------------------------|-----------------|----------------|--------------|
|                       | hIL-2                  | hIL-2R $\alpha$ | hIL-2R $\beta$ |              |
| F5111 Ab              | 2.7                    | -               | -              | 2A, S1C, S1D |
| hIL-2                 | -                      | 16              | 480            | 2A, S1C, S1D |
| Control IC            | -                      | 3.4             | 4.4            | 2A           |
| hIL-2/F5111 Complex   | 4.8                    | 18              | >2000          | 2A           |
| F5111 IC LN35         | >2000                  | 3.0             | >2000          | 2A           |
| hIL-2                 | -                      | 25              | 470            | 3B, S3B, S5C |
| Control IC            | -                      | 2.5             | 4.1            | 3B, S3B      |
| F5111 IC              | >2000                  | 3.2             | >2000          | 3B, S3B, S4A |
| Y33A IC               | >2000                  | 2.6             | >2000          | 3B, S3B      |
| Y94A IC               | >2000                  | 2.2             | >2000          | 3B, S3B      |
| S96A IC               | >2000                  | 2.5             | >2000          | 3B, S3B      |
| Y35A IC               | >2000                  | 2.5             | >2000          | 3B, S3B      |
| Y52A IC               | >2000                  | 2.8             | 500            | 3B, S3B      |
| Y54A IC               | >2000                  | 2.8             | >2000          | 3B, S3B      |
| Y60A IC               | >2000                  | 2.7             | >2000          | 3B, S3B      |
| V103A IC              | >2000                  | 2.4             | >2000          | 3B, S3B      |
| F5111.2 IC            | >2000                  | 2.4             | >2000          | 3B, S3B      |
| F5111 IC LN15         | >2000                  | 7.5             | 210            | S1C          |
| F5111 IC LN25         | >2000                  | 3.4             | >2000          | S1D          |
| F5111 Ab              | 2.1                    | -               | -              | S1E          |
| hIL-2                 | -                      | 16              | 310            | S1E          |
| F5111 IC LN25 P1      | >2000                  | 11              | >700           | S1E          |
| F5111 IC LN25 P2      | >2000                  | 8.1             | >1000          | S1E          |
| F5111 IC LN25 P3      | >2000                  | 4.8             | >2000          | S1E          |
| Control IC + N297A    | -                      | 3.8             | 7.7            | S4A, S5C     |
| F5111 IC + N297A      | >2000                  | 3.6             | >2000          | S4A, S5C     |
| F5111.2 Ab + N297A    | 4.9                    | -               | -              | S5C          |
| hIL-2/F5111.2 Complex | 5.6                    | 68              | >2000          | S5C          |

**Table S3. EC<sub>50</sub> and E<sub>Max</sub> Values from YT-1 cell activation studies.  
Related to Figure 2.**

| Treatment           | EC <sub>50</sub> (nM) |                     | Normalized E <sub>Max</sub> |                     | Figure       |
|---------------------|-----------------------|---------------------|-----------------------------|---------------------|--------------|
|                     | IL-2Rα <sup>+</sup>   | IL-2Rα <sup>-</sup> | IL-2Rα <sup>+</sup>         | IL-2Rα <sup>-</sup> |              |
| hIL-2               | 0.13                  | 0.88                | 82                          | 69                  | 2B, S1F, S1G |
| Control IC          | 0.031                 | 0.83                | 87                          | 91                  | 2B           |
| hIL-2/F5111 Complex | 0.081                 | 1.8                 | 85                          | 62                  | 2B           |
| F5111 IC LN35       | 0.70                  | >2000               | 80                          | 21                  | 2B           |
| hIL-2               | -                     | 0.98                | -                           | 94                  | S1B          |
| hIL-2:F5111 = 1:1   | -                     | 0.91                | -                           | 88                  | S1B          |
| hIL-2:F5111 = 1:2   | -                     | 0.89                | -                           | 74                  | S1B          |
| hIL-2:F5111 = 1:4   | -                     | 0.35                | -                           | 64                  | S1B          |
| hIL-2:F5111 = 1:7.5 | -                     | 1.7                 | -                           | 60                  | S1B          |
| F5111 IC LN15       | 0.10                  | 13                  | 76                          | 65                  | S1F, S1G     |
| F5111 IC LN25       | 0.58                  | >2000               | 84                          | 23                  | S1F, S1G     |
| hIL-2               | -                     | 0.57                | -                           | 83                  | S1H (top)    |
| F5111 IC LN15 P1    | -                     | 8.9                 | -                           | 75                  | S1H          |
| F5111 IC LN15 P2    | -                     | 6.9                 | -                           | 87                  | S1H          |
| hIL-2               | -                     | 0.68                | -                           | 81                  | S1H (bottom) |
| F5111 IC LN25 P1    | -                     | 37                  | -                           | 73                  | S1H          |
| F5111 IC LN25 P2    | -                     | 69                  | -                           | 82                  | S1H          |
| F5111 IC LN25 P3    | -                     | >2000               | -                           | 76                  | S1H          |



**Table S4. EC<sub>50</sub> and E<sub>Max</sub> values from human PBMC activation studies.  
Related to Figures 2, 3, and 5.**

| Treatment             | EC <sub>50</sub> (pM) |                    |                   | E <sub>Max</sub> (pSTAT5 MFI) |                    |                   | Figure  |
|-----------------------|-----------------------|--------------------|-------------------|-------------------------------|--------------------|-------------------|---------|
|                       | Treg                  | CD8 <sup>+</sup> T | T <sub>Conv</sub> | Treg                          | CD8 <sup>+</sup> T | T <sub>Conv</sub> |         |
| hIL-2                 | 4.5                   | 1200               | 110               | 5300                          | 3600               | 2500              | 2C      |
| Control IC            | 1.3                   | 1600               | 30                | 5200                          | 3300               | 2400              | 2C      |
| hIL-2/F5111 Complex   | 3.7                   | 240                | 70                | 5100                          | 2200               | 2200              | 2C      |
| F5111 IC LN35         | 1700                  | 6.1e4              | 3.7e4             | 5200                          | 760                | 1100              | 2C      |
| hIL-2                 | 5.2                   | 1000               | 110               | 5300                          | 3500               | 2400              | 3C      |
| Control IC            | 1.4                   | 1500               | 39                | 5600                          | 3600               | 2500              | 3C      |
| F5111 IC              | 2100                  | 5.0e4              | 3.4e4             | 5500                          | 740                | 980               | 3C      |
| Y33A IC               | 81                    | 2.2e4              | 1.5e4             | 5300                          | 1100               | 1400              | 3C      |
| Y94A IC               | 6.9                   | 4300               | 1200              | 5400                          | 1800               | 1900              | 3C      |
| S96A IC               | 910                   | 3.3e4              | 2.6e4             | 5100                          | 710                | 1000              | 3C      |
| Y35A IC               | 7.7                   | 4100               | 1400              | 5700                          | 1800               | 2100              | 3C      |
| Y52A IC               | 2.9                   | 3500               | 360               | 5500                          | 2300               | 2200              | 3C      |
| Y54A IC               | 7.8                   | 3000               | 1300              | 5500                          | 1600               | 1900              | 3C      |
| Y60A IC               | 15                    | 5300               | 2900              | 5400                          | 1400               | 1800              | 3C      |
| V103A IC              | 51                    | 1.3e4              | 7400              | 5300                          | 1000               | 1400              | 3C      |
| F5111.2 IC            | 8600                  | >2.0e5             | >2.0e5            | 4700                          | 370                | 460               | 3C      |
| hIL-2                 | 1.8                   | 890                | 35                | 3700                          | 2800               | 2100              | 5A      |
| Control IC + N297A    | 0.87                  | 2900               | 19                | 3600                          | 2700               | 2000              | 5A, S4B |
| F5111 IC + N297A      | 1500                  | 1.8e4              | 1.8e4             | 3800                          | 400                | 770               | 5A, S4B |
| hIL-2/F5111.2 Complex | 8.2                   | 190                | 140               | 3700                          | 570                | 1100              | 5A      |
| F5111 IC w/o N297A    | 1700                  | 3.2e4              | 3.4e4             | 3600                          | 380                | 700               | S4B     |
| hIL-2                 | 1.9                   | 660                | 84                | 4800                          | 3400               | 2800              | S4C     |
| Control IC + N297A    | 0.48                  | 1200               | 16                | 4700                          | 3200               | 2600              | S4C     |
| Y60A IC + N297A       | 17                    | 6300               | 2900              | 4900                          | 1100               | 1500              | S4C     |
| V103A IC + N297A      | 42                    | 1.3e4              | 7200              | 4800                          | 950                | 1400              | S4C     |
| Y33A IC + N297A       | 47                    | 1.5e4              | 8000              | 4900                          | 1000               | 1500              | S4C     |
| F5111 IC + N297A      | 440                   | 1.8e4              | 7900              | 4900                          | 790                | 1200              | S4C     |
| F5111.2 IC + N297A    | 1800                  | 1.3e4              | 1.1e4             | 4300                          | 310                | 430               | S4C     |



**Table S5. EC<sub>50</sub> and E<sub>Max</sub> values from mouse splenocyte activation studies. Related to Figures 3 and 4.**

| Treatment          | EC <sub>50</sub> (pM) |                    |                   | E <sub>Max</sub> (pSTAT5 MFI) |                    |                   | Figure |
|--------------------|-----------------------|--------------------|-------------------|-------------------------------|--------------------|-------------------|--------|
|                    | Treg                  | CD8 <sup>+</sup> T | T <sub>Conv</sub> | Treg                          | CD8 <sup>+</sup> T | T <sub>Conv</sub> |        |
| hIL-2              | 6.8                   | 1.3e5              | -                 | 8600                          | 5700               | 1000              | S4D    |
| Control IC + N297A | 3.2                   | 2.9e5              | -                 | 8600                          | 4900               | 1100              | S4D    |
| Y60A IC + N297A    | 93                    | >2e6               | -                 | 8400                          | 280                | 650               | S4D    |
| V103A IC + N297A   | 260                   | >2e6               | -                 | 8000                          | 370                | 720               | S4D    |
| Y33A IC + N297A    | 270                   | >2e6               | -                 | 8100                          | 340                | 680               | S4D    |
| F5111 IC + N297A   | 2100                  | >2e6               | -                 | 7700                          | 320                | 720               | S4D    |
| F5111.2 IC + N297A | 6300                  | >2e6               | -                 | 5500                          | 220                | 660               | S4D    |
